# Supplementary material
Source: PubMed Central journal article supplement (PMC4649152)
Supplement: AAC.01248-15_zac012154609so1.pdf [file AAC.01248-15_zac012154609so1.pdf]

**Table S1. Primary High Throughput Screening Results For Compounds With Known Antibacterial Activity**

| compound names              | ug/ml | μM | fold reduction | z lux | z cytotox | z anti-tox | hit strength |
|-----------------------------|-------|----|----------------|-------|-----------|------------|--------------|
| 4-aminosalicylic acid       | 4     | 26 | 1              | -1.2  | -0.8      | 0.8        |              |
| acedapsone                  | 4     | 12 | 1              | -0.1  | -1.3      | 0.1        |              |
| actinomycin D               | 10    | 22 | 309            | 15.3  | -6.9      | 18.2       | very strong  |
| actinonin                   | 8     | 20 | 1              | -1.6  | -1.2      | 0.0        |              |
| alamethicin                 | 10    | 5  | 1              | 0.1   | 8.1       | -0.7       | toxic        |
| amikacin hydrate            | 4     | 6  | 6              | 7.8   | -2.4      | 2.1        | weak         |
| amikacin sulfate            | 16    | 20 | 1              | -2.8  | -1.7      | 0.4        |              |
| amikacin sulfate            | 4     | 5  | 1              | 0.1   | -2.4      | 1.8        |              |
| amoxicillin crystalline     | 7     | 20 | 1              | 0.0   | -0.1      | -0.2       |              |
| amoxicillin                 | 7     | 20 | 1              | 0.4   | -1.5      | 0.8        |              |
| amoxicillin                 | 4     | 11 | 1              | 0.4   | -0.3      | 0.0        |              |
| amoxicillin                 | 4     | 11 | 1              | 0.8   | -1.7      | 3.2        |              |
| ampicillin sodium           | 7     | 20 | 1              | 0.0   | -0.8      | 0.4        |              |
| ampicillin sodium           | 7     | 20 | 1              | -0.6  | -0.9      | 0.8        |              |
| ampicillin sodium           | 4     | 11 | 1              | 0.0   | -2.4      | 2.1        |              |
| ampicillin trihydrate       | 4     | 11 | 1              | -1.4  | -0.6      | 0.4        |              |
| ampicillin trihydrate       | 4     | 10 | 1              | -1.2  | -0.5      | 0.0        |              |
| anisomycin                  | 5     | 20 | 2              | 5.0   | 24.9      | -24.9      | toxic        |
| anisomycin                  | 4     | 15 | 2              | 5.3   | 29.7      | -29.7      | toxic        |
| anisomycin                  | 10    | 38 | 4              | 11.7  | 32.5      | -4.0       | toxic        |
| anisomycin                  | 5     | 20 | 5              | 5.9   | 20.0      | -20.0      | toxic        |
| apramycin                   | 11    | 20 | 1              | -2.5  | 0.5       | -0.5       |              |
| apramycin                   | 4     | 7  | 1              | -1.6  | -0.8      | 0.0        |              |
| apramycin                   | 4     | 7  | 1              | -0.3  | -1.3      | 1.0        |              |
| apramycin                   | 4     | 7  | 2              | 3.4   | -1.4      | 0.2        | detectable   |
| azithromycin dihydrate      | 16    | 20 | complete       | 22.7  | -4.2      | 12.0       | very strong  |
| azithromycin                | 4     | 5  | 3367           | 7.0   | -2.2      | 18.5       | very strong  |
| azithromycin                | 15    | 20 | 3723           | 9.6   | -3.9      | 3.8        | very strong  |
| azithromycin                | 15    | 20 | complete       | 11.9  | -4.1      | 11.9       | very strong  |
| azithromycin                | 4     | 5  | complete       | 12.9  | -2.4      | 10.2       | very strong  |
| azlocillin sodium salt      | 4     | 8  | 1              | -0.3  | 0.3       | -0.3       |              |
| azlocillin sodium           | 10    | 20 | 1              | -5.5  | 0.1       | -0.1       |              |
| azlocillin sodium           | 4     | 8  | 1              | -1.0  | -3.0      | 1.0        |              |
| aztreonam                   | 4     | 9  | 1              | -1.5  | -0.8      | 0.9        |              |
| aztreonam                   | 4     | 9  | 1              | -2.6  | -0.8      | 0.0        |              |
| aztreonam                   | 4     | 9  | 1              | 1.5   | 0.0       | 0.2        |              |
| bacampicillin hydrochloride | 4     | 8  | 1              | 0.7   | -4.0      | 2.3        |              |
| bacampicillin hydrochloride | 4     | 8  | 1              | 1.4   | 0.5       | -0.5       |              |
| bacitracin                  | 28    | 20 | 1              | -2.4  | -1.8      | 0.7        |              |
| bacitracin                  | 4     | 3  | 1              | -0.3  | -3.0      | 2.3        |              |
| bacitracin                  | 4     | 3  | 1              | 0.9   | -0.5      | 0.0        |              |
| bekanamycin sulfate         | 12    | 20 | 1              | -1.3  | -0.3      | 0.0        |              |
| bekanamycin sulfate         | 4     | 7  | 1              | 0.9   | -0.6      | 0.0        |              |
| benzathine benzylpenicillin | 4     | 4  | 1              | 0.7   | 2.0       | -2.0       |              |
| benzyl penicillin potassium | 7     | 20 | 1              | -5.2  | -0.9      | 0.2        |              |
| benzylpenicillin sodium     | 4     | 11 | 1              | 0.8   | 1.0       | -1.0       |              |
| bleomycin                   | 4     | 2  | 2              | 4.0   | -3.8      | 5.6        | detectable   |
| bleomycin sulfate           | 4     | 3  | 3              | 8.1   | -3.4      | 8.8        | detectable   |
| capreomycin sulfate         | 15    | 20 | 1              | -4.3  | 1.0       | -1.0       |              |
| capreomycin sulfate         | 4     | 5  | 1              | -0.7  | -1.6      | 2.0        |              |
| carbadox                    | 5     | 20 | 2              | 4.6   | -1.2      | 0.9        | detectable   |
| carbadox                    | 4     | 15 | 5              | 7.2   | -2.1      | 6.3        | weak         |
| carbadox                    | 4     | 15 | 121            | 7.0   | -1.1      | 17.0       | strong       |

|                                |    |    |   |      |      |      |            |
|--------------------------------|----|----|---|------|------|------|------------|
| carbenicillin disodium         | 8  | 20 | 1 | -0.3 | -1.2 | 0.2  |            |
| carbenicillin disodium         | 4  | 9  | 1 | 0.1  | -1.3 | 1.7  |            |
| cefaclor                       | 7  | 20 | 1 | -0.3 | -1.9 | 0.9  |            |
| cefaclor                       | 4  | 10 | 1 | 1.0  | -0.6 | 1.0  |            |
| cefaclor                       | 4  | 11 | 1 | 1.7  | -0.2 | 0.0  |            |
| cefadroxil                     | 4  | 11 | 1 | -1.4 | 0.5  | -0.5 |            |
| cefadroxil                     | 7  | 20 | 1 | -0.7 | -0.4 | 0.0  |            |
| cefadroxil                     | 4  | 11 | 1 | -0.8 | -3.3 | 2.1  |            |
| cefalonium                     | 4  | 9  | 1 | -0.6 | 0.3  | -0.3 |            |
| cefamandole nafate             | 10 | 20 | 1 | -0.7 | -1.6 | 0.4  |            |
| cefamandole nafate             | 4  | 8  | 1 | 0.3  | -1.7 | 1.1  |            |
| cefamandole sodium salt        | 4  | 8  | 1 | 0.7  | 0.4  | -0.4 |            |
| cefamandole sodium             | 4  | 8  | 1 | -1.6 | -0.5 | 0.2  |            |
| cefatrizine propylene glycol   | 11 | 20 | 1 | -1.1 | -0.1 | 0.6  |            |
| cefazolin sodium salt          | 4  | 8  | 1 | 0.7  | 0.0  | 0.0  |            |
| cefazolin sodium               | 10 | 20 | 1 | 2.1  | -2.6 | 0.2  |            |
| cefazolin sodium               | 10 | 20 | 1 | -2.1 | -0.7 | 0.0  |            |
| cefazolin sodium               | 4  | 8  | 1 | -0.2 | -3.9 | 0.7  |            |
| cefdinir                       | 4  | 10 | 1 | -0.9 | -5.2 | 2.2  |            |
| cefdinir                       | 8  | 20 | 1 | -0.3 | 0.1  | -0.1 |            |
| cefditorin pivoxil             | 12 | 20 | 1 | -3.0 | -1.1 | 0.0  |            |
| cefditorin pivoxil             | 4  | 6  | 1 | 0.1  | -3.8 | 1.6  |            |
| cefepime hydrochloride         | 4  | 7  | 2 | 2.8  | -0.4 | 0.4  |            |
| cefepime                       | 4  | 8  | 1 | 1.9  | -2.7 | 3.1  |            |
| cefixime trihydrate            | 9  | 20 | 1 | 0.4  | -1.2 | 1.9  |            |
| cefixime                       | 4  | 9  | 1 | -1.0 | -1.2 | 0.0  |            |
| cefmenoxime hydrochloride      | 11 | 20 | 1 | 0.3  | -0.8 | 0.0  |            |
| cefmetazole sodium salt        | 4  | 8  | 1 | 1.6  | 0.4  | -0.4 |            |
| cefmetazole sodium;            | 10 | 20 | 1 | 0.5  | -2.5 | 1.5  |            |
| cefmetazole sodium             | 10 | 20 | 1 | -1.3 | -2.0 | 0.7  |            |
| cefmetazole sodium             | 4  | 8  | 1 | 2.2  | -1.5 | 1.7  |            |
| cefonicid sodium               | 4  | 7  | 1 | -0.2 | -1.2 | 0.6  |            |
| cefoperazone acid              | 4  | 6  | 1 | -1.1 | -0.8 | 0.6  |            |
| cefoperazone dihydrate         | 4  | 6  | 1 | 0.3  | 1.1  | -1.1 |            |
| cefoperazone sodium            | 4  | 6  | 1 | 1.2  | -2.6 | 2.7  |            |
| cefoperazone sodium            | 13 | 20 | 2 | 4.0  | -3.1 | 1.6  | detectable |
| ceforanide                     | 4  | 8  | 1 | 1.6  | -1.1 | 0.0  |            |
| cefotaxime acid                | 4  | 9  | 1 | 0.8  | -1.0 | 2.1  |            |
| cefotaxime sodium salt         | 10 | 20 | 1 | 0.1  | -0.6 | 0.0  |            |
| cefotaxime sodium salt         | 4  | 8  | 1 | 0.8  | -1.2 | 1.0  |            |
| cefotaxime sodium              | 10 | 20 | 1 | 3.3  | -2.4 | 3.0  | detectable |
| cefotaxime sodium              | 10 | 20 | 1 | 0.6  | 0.6  | -0.6 |            |
| cefotaxime sodium              | 4  | 8  | 1 | 0.0  | -1.5 | 3.7  |            |
| cefotetan                      | 4  | 7  | 1 | 1.9  | -1.4 | 0.0  |            |
| cefotiam hydrochloride         | 4  | 7  | 1 | 2.2  | -0.1 | 0.0  |            |
| cefoxitin sodium salt          | 4  | 9  | 2 | 3.2  | -0.9 | 0.5  | detectable |
| cefoxitin sodium               | 9  | 20 | 1 | -0.9 | -1.3 | 0.8  |            |
| cefoxitin sodium               | 4  | 9  | 1 | 1.7  | -2.9 | 3.6  |            |
| cefpiramide                    | 12 | 20 | 1 | -8.9 | -0.8 | 0.0  |            |
| cefpodoxime proxetil           | 11 | 20 | 1 | -1.7 | -1.4 | 1.6  |            |
| cefpodoxime proxetil           | 4  | 7  | 1 | 0.5  | -2.3 | 1.0  |            |
| cefprozil                      | 8  | 20 | 1 | -3.0 | -1.2 | 0.0  |            |
| cefprozil                      | 4  | 10 | 1 | -0.2 | -2.2 | 0.7  |            |
| cefsulodin sodium salt hydrate | 11 | 20 | 1 | 0.0  | -2.4 | 1.1  |            |
| cefsulodin sodium salt         | 4  | 7  | 1 | 0.4  | 0.1  | -0.1 |            |
| cefsulodin sodium              | 4  | 7  | 1 | -1.2 | -3.2 | 0.4  |            |
| ceftazidime pentahydrate       | 4  | 6  | 2 | 4.8  | -1.1 | 0.0  | detectable |
| ceftazidime                    | 4  | 7  | 1 | 1.6  | -1.8 | 2.7  |            |
| ceftazidime                    | 4  | 7  | 1 | 1.4  | -0.9 | 3.3  |            |

|                                 |    |    |          |      |      |      |             |
|---------------------------------|----|----|----------|------|------|------|-------------|
| ceftibuten                      | 8  | 20 | 1        | -1.7 | -0.4 | 0.0  |             |
| ceftibuten                      | 4  | 10 | 1        | -0.5 | -1.2 | 0.2  |             |
| ceftiofur hydrochloride         | 11 | 20 | 1        | 1.2  | -0.4 | 0.0  |             |
| ceftriaxone sodium trihydrate   | 13 | 20 | 1        | 0.7  | -0.8 | 0.7  |             |
| ceftriaxone sodium trihydrate   | 13 | 20 | 1        | 1.1  | -1.2 | 1.1  |             |
| ceftriaxone sodium trihydrate   | 4  | 6  | 1        | 3.0  | -2.1 | 3.7  | detectable  |
| ceftriaxone sodium              | 12 | 20 | 1        | 3.3  | -2.6 | 3.3  | detectable  |
| cefuroxime axetil               | 4  | 8  | 1        | -0.4 | -0.7 | -0.1 |             |
| cefuroxime sodium salt          | 4  | 9  | 1        | -0.4 | 0.5  | -0.5 |             |
| cefuroxime sodium               | 9  | 20 | 1        | -3.6 | -1.5 | 0.8  |             |
| cefuroxime sodium               | 4  | 9  | 1        | -1.1 | -2.3 | 0.0  |             |
| cefuroxime                      | 8  | 20 | 1        | -0.4 | -0.8 | 0.2  |             |
| cephalexin hydrate              | 7  | 20 | 1        | 1.0  | -1.9 | 0.3  |             |
| cephalexin monohydrate          | 4  | 11 | 1        | 0.3  | -0.7 | 0.0  |             |
| cephalexin                      | 7  | 20 | 1        | -5.7 | -2.7 | 0.0  |             |
| cephalexin                      | 4  | 12 | 1        | -2.5 | -2.1 | -0.4 |             |
| cephaloridine                   | 8  | 20 | 1        | -0.9 | -2.1 | 1.1  |             |
| cephalosporanic acid, 7-amino   | 4  | 15 | 1        | -1.1 | 2.0  | -2.0 |             |
| cephalosporin c sodium          | 9  | 20 | 1        | -3.5 | 0.9  | -0.9 |             |
| cephalosporin c zinc salt       | 10 | 20 | 1        | -0.1 | -2.3 | 0.3  |             |
| cephalothin sodium salt         | 4  | 10 | 1        | 0.4  | 0.2  | -0.2 |             |
| cephalothin sodium              | 8  | 20 | 1        | -2.8 | 1.1  | -1.1 |             |
| cephalothin sodium              | 4  | 10 | 1        | -1.4 | -1.5 | 0.9  |             |
| cephalothin sodium              | 8  | 20 | 1        | -0.2 | -3.2 | 0.8  |             |
| cephapirin sodium               | 9  | 20 | 1        | -3.5 | 2.5  | -2.5 |             |
| cephapirin sodium               | 4  | 9  | 1        | -1.1 | -0.1 | 0.0  |             |
| cepharantine                    | 12 | 20 | 1        | -2.4 | 4.0  | -4.0 | toxic       |
| cephradine                      | 7  | 20 | 1        | -0.8 | -3.6 | 0.1  |             |
| cephradine                      | 7  | 20 | 1        | -2.3 | 2.4  | -2.4 |             |
| cephradine                      | 4  | 11 | 1        | -1.0 | 0.3  | -0.4 |             |
| chloramphenicol hemisuccinate   | 4  | 9  | 3        | 5.6  | -3.5 | 11.6 | detectable  |
| chloramphenicol hemisuccinate   | 8  | 20 | 159      | 12.6 | -0.9 | 0.1  | strong      |
| chloramphenicol palmitate       | 4  | 7  | 75       | 8.3  | -3.6 | 15.0 | strong      |
| chloramphenicol                 | 4  | 12 | 167      | 12.7 | -4.6 | 3.5  | strong      |
| chloramphenicol                 | 6  | 20 | 496      | 11.8 | -3.4 | 11.0 | very strong |
| chloramphenicol                 | 4  | 12 | 509      | 8.4  | -5.7 | 14.1 | very strong |
| chloramphenicol                 | 6  | 20 | 1307     | 12.7 | -2.0 | 0.9  | very strong |
| chloramphenicol                 | 4  | 12 | complete | 7.1  | -1.5 | 17.6 | very strong |
| chlorhexidine                   | 4  | 8  | 1        | -7.4 | 7.7  | -7.7 | toxic       |
| chlorhexidine                   | 12 | 20 | 1        | -2.3 | 0.3  | -0.3 |             |
| chlorhexidine                   | 4  | 7  | 1        | -0.5 | -2.3 | 0.8  |             |
| chloroxine                      | 4  | 20 | 1        | 0.4  | -0.3 | 0.5  |             |
| chloroxine                      | 4  | 20 | 1        | 1.2  | 0.1  | -0.1 |             |
| chloroxine                      | 4  | 19 | 3        | 14.0 | -0.7 | 8.1  | detectable  |
| chloroxylenol                   | 3  | 20 | 1        | -0.5 | -1.0 | 0.0  |             |
| chloroxylenol                   | 4  | 26 | 1        | 0.5  | -1.1 | 1.0  |             |
| chlortetracycline hydrochloride | 10 | 20 | 1        | -5.5 | 2.6  | -2.6 |             |
| chlortetracycline hydrochloride | 4  | 8  | 1        | 0.7  | -1.9 | 1.2  |             |
| chlortetracycline hydrochloride | 4  | 8  | 1        | 1.9  | -5.5 | 13.2 |             |
| cinoxacin                       | 5  | 20 | 1        | 1.5  | -2.5 | 0.2  |             |
| cinoxacin                       | 5  | 20 | 1        | -1.8 | 1.4  | -1.4 |             |
| cinoxacin                       | 4  | 15 | 1        | 1.2  | -3.6 | 0.0  |             |
| cinoxacin                       | 4  | 15 | 1        | 0.7  | 0.1  | -0.1 |             |
| ciprofloxacin hydrochloride     | 4  | 10 | 343      | 12.8 | -5.1 | 2.7  | very strong |
| ciprofloxacin                   | 4  | 12 | 255      | 8.9  | -2.9 | 8.1  | strong      |
| ciprofloxacin                   | 7  | 20 | 1468     | 9.5  | -3.0 | 1.9  | very strong |
| ciprofloxacin                   | 4  | 12 | complete | 7.0  | -1.6 | 18.3 | very strong |
| clarithromycin                  | 15 | 20 | 746      | 9.5  | -2.9 | 2.6  | very strong |
| clarithromycin                  | 15 | 20 | complete | 12.3 | -4.1 | 15.1 | very strong |

|                                     |    |    |          |      |       |      |             |
|-------------------------------------|----|----|----------|------|-------|------|-------------|
| clarithromycin                      | 4  | 5  | complete | 7.1  | -1.6  | 18.0 | very strong |
| clarithromycin                      | 4  | 5  | complete | 12.9 | -1.9  | 10.4 | very strong |
| clavulanate lithium                 | 4  | 19 | 1        | 0.0  | -3.1  | 2.0  |             |
| clinafloxacin hcl                   | 4  | 11 | complete | 7.1  | -1.4  | 18.3 | very strong |
| clinafloxacin hydrochloride         | 8  | 20 | 1        | 0.9  | -4.2  | 2.9  |             |
| clindamycin hcl                     | 4  | 9  | 6        | 10.0 | -2.4  | 7.1  | weak        |
| clindamycin hydrochloride           | 4  | 9  | 1        | 0.8  | -2.3  | 4.9  |             |
| clindamycin hydrochloride           | 4  | 9  | 4        | 9.7  | -2.3  | 1.9  | weak        |
| clindamycin palmitate hydrochloride | 4  | 6  | 1        | 0.0  | -0.1  | 0.5  |             |
| clindamycin palmitate               | 4  | 9  | 1        | -7.6 | -2.2  | 0.5  |             |
| clindamycin po4                     | 4  | 6  | 1        | -3.0 | -1.3  | 0.0  |             |
| clofazimine                         | 4  | 8  | 1        | -0.6 | -10.4 | 0.8  |             |
| clofazimine                         | 9  | 20 | 1        | 1.2  | -0.4  | 0.1  |             |
| clofazimine                         | 4  | 8  | 2        | 2.9  | -7.5  | 6.2  |             |
| cloxacillin sodium salt             | 4  | 9  | 1        | -0.9 | 0.6   | -0.6 |             |
| cloxacillin sodium                  | 9  | 20 | 1        | -4.6 | -2.3  | 0.0  |             |
| cloxacillin sodium                  | 4  | 9  | 1        | -0.6 | -1.7  | 2.4  |             |
| cloxyquin                           | 4  | 20 | 1        | -3.7 | -2.2  | 1.8  |             |
| cloxyquin                           | 4  | 22 | 1        | -0.3 | -3.2  | 3.8  |             |
| colistimethate sodium               | 35 | 20 | 1        | -8.8 | 3.8   | -3.8 | toxic       |
| colistimethate sodium               | 4  | 2  | 1        | 0.3  | 3.1   | -3.0 | toxic       |
| colistin sulfate                    | 4  | 3  | 1        | -2.8 | 3.4   | -3.4 | toxic       |
| colistin sulfate                    | 4  | 3  | 1        | -0.7 | 4.6   | -2.2 | toxic       |
| n'-desmethylazithromycin hydrate    | 15 | 20 | 1        | -9.4 | -3.7  | 1.9  |             |
| cycloserine                         | 2  | 20 | 1        | -4.3 | -0.6  | 0.0  |             |
| cycloserine                         | 4  | 39 | 1        | -1.0 | -3.1  | 2.9  |             |
| d-cycloserine                       | 2  | 20 | 1        | -1.0 | -0.6  | 0.6  |             |
| d-cycloserine                       | 2  | 20 | 1        | 0.3  | -2.2  | 0.1  |             |
| d-cycloserine                       | 4  | 39 | 1        | -2.5 | -0.3  | 0.3  |             |
| d-cycloserine                       | 2  | 20 | 1        | -0.5 | -1.3  | 1.5  |             |
| dactinomycin                        | 4  | 3  | 7        | 7.1  | 7.0   | 5.8  | toxic       |
| dactinomycin                        | 25 | 20 | 277      | 12.2 | 3.0   | 6.4  | toxic       |
| dactinomycin                        | 25 | 20 | 545      | 7.9  | 0.3   | -0.3 | very strong |
| dapsone                             | 5  | 20 | 1        | -4.5 | 0.0   | 0.0  |             |
| dapsone                             | 4  | 16 | 1        | -2.0 | -0.4  | 0.0  |             |
| dapsone                             | 4  | 16 | 1        | -0.4 | -2.1  | 3.1  |             |
| daptomycin                          | 32 | 20 | 1        | 0.2  | -0.7  | 0.0  |             |
| daunorubicin hcl                    | 4  | 8  | 2        | 4.0  | -7.9  | 14.4 | detectable  |
| daunorubicin hydrochloride          | 4  | 7  | 1        | -0.3 | -16.8 | 16.8 |             |
| daunorubicin hydrochloride          | 11 | 20 | 3        | 7.0  | -5.2  | 11.3 | detectable  |
| daunorubicin hydrochloride          | 11 | 20 | 5        | 5.9  | -7.2  | 6.8  | weak        |
| daunorubicin                        | 4  | 8  | 1        | -2.6 | -16.5 | 19.6 |             |
| decyoinine                          | 10 | 36 | 7        | 9.7  | -0.3  | 10.6 | weak        |
| demeclocycline hydrochloride        | 10 | 20 | 151      | 9.7  | -2.8  | 2.4  | strong      |
| demeclocycline hydrochloride        | 10 | 20 | 1        | -1.8 | -2.2  | 1.1  |             |
| demeclocycline hydrochloride        | 4  | 8  | 41       | 6.3  | -1.1  | 0.6  | mod         |
| demeclocycline hydrochloride        | 4  | 8  | 51       | 8.2  | -3.1  | 17.2 | mod         |
| demeclocycline                      | 9  | 20 | 349      | 11.8 | -2.4  | 10.4 | very strong |
| dibekacin                           | 11 | 20 | 1        | -0.7 | -0.1  | 0.0  |             |
| dicloxacillin sodium salt           | 4  | 8  | 1        | -0.2 | -0.7  | 0.0  |             |
| dicloxacillin sodium                | 10 | 20 | 1        | -3.9 | -2.4  | 0.7  |             |
| dicloxacillin sodium                | 10 | 20 | 1        | -2.5 | 0.4   | 0.0  |             |
| dicloxacillin sodium                | 4  | 8  | 1        | -0.6 | -2.4  | 2.5  |             |
| difloxacin hydrochloride            | 9  | 20 | 1        | -1.5 | -3.6  | 2.9  |             |
| dihydrostreptomycin sulfate         | 14 | 20 | 1        | -1.5 | -2.8  | 2.2  |             |
| dihydrostreptomycin sulfate         | 4  | 3  | 1        | -0.3 | -1.0  | 0.4  |             |
| dihydrostreptomycin sulfate         | 4  | 6  | 1        | 0.0  | -2.5  | 1.7  |             |
| dirithromycin                       | 4  | 5  | 1        | -2.5 | -2.7  | 1.8  |             |

|                             |    |    |          |       |       |      |             |
|-----------------------------|----|----|----------|-------|-------|------|-------------|
| dirithromycin               | 17 | 20 | 1        | -1.3  | -0.9  | 0.0  |             |
| dirithromycin               | 4  | 5  | 1        | -0.1  | -2.0  | 0.0  |             |
| doxorubicin hcl             | 4  | 7  | 1        | 3.4   | -8.8  | 15.1 | detectable  |
| doxorubicin hydrochloride   | 4  | 7  | 1        | -7.9  | -19.5 | 19.3 |             |
| doxorubicin hydrochloride   | 12 | 20 | 1        | 1.0   | -6.4  | 15.8 |             |
| doxorubicin hydrochloride   | 12 | 20 | 5        | 7.5   | -12.0 | 10.8 | weak        |
| doxorubicin                 | 4  | 7  | 1        | -0.7  | -20.5 | 11.0 |             |
| doxorubicin                 | 10 | 17 | 3        | 7.5   | -7.3  | 16.2 | detectable  |
| doxycycline hcl             | 4  | 9  | 260      | 7.0   | -1.2  | 17.4 | very strong |
| doxycycline hyclate         | 4  | 8  | 364      | 6.4   | -2.0  | 1.1  | very strong |
| doxycycline hydrochloride   | 10 | 20 | 12       | 11.6  | -1.9  | 0.8  | weak        |
| doxycycline hydrochloride   | 4  | 8  | 1359     | 8.4   | -4.7  | 16.1 | very strong |
| doxycycline hydrochloride   | 10 | 20 | complete | 9.8   | -1.0  | 0.0  | very strong |
| doxycycline                 | 9  | 20 | 780      | 11.9  | -2.8  | 11.3 | very strong |
| enoxacin                    | 4  | 12 | 474      | 7.0   | -1.4  | 17.9 | very strong |
| enoxacin                    | 6  | 20 | 10581    | 9.6   | -3.0  | 2.7  | very strong |
| enoxacin                    | 4  | 12 | complete | 22.5  | -3.6  | 14.9 | very strong |
| enrofloxacin                | 4  | 11 | 5738     | 7.0   | -1.6  | 18.4 | very strong |
| enrofloxacin                | 7  | 20 | complete | 12.2  | -2.0  | 16.3 | very strong |
| enrofloxacin                | 4  | 11 | complete | 8.9   | -5.5  | 8.8  | very strong |
| epirubicin hydrochloride    | 12 | 20 | 2        | 6.2   | -6.8  | 15.5 | detectable  |
| eryped                      | 17 | 20 | 993      | 11.9  | -3.2  | 11.3 | very strong |
| erythromycin estolate       | 21 | 20 | 1        | -9.7  | 2.1   | -2.1 |             |
| erythromycin estolate       | 4  | 4  | 1        | -10.7 | -2.7  | 3.3  |             |
| erythromycin ethylsuccinate | 4  | 5  | 1        | -3.0  | -0.5  | 1.9  |             |
| erythromycin ethylsuccinate | 17 | 20 | 12       | 7.2   | -1.0  | 0.4  | weak        |
| erythromycin stearate       | 20 | 20 | 1        | -0.2  | -2.9  | 1.4  |             |
| erythromycin                | 15 | 20 | 1        | -3.2  | 0.9   | -0.9 |             |
| erythromycin                | 4  | 5  | 1        | 0.7   | -1.4  | 0.2  |             |
| erythromycin                | 4  | 5  | 2        | 4.5   | -1.7  | 11.2 | detectable  |
| ethambutol dihydrochloride  | 4  | 14 | 1        | -0.6  | -0.9  | 0.0  |             |
| ethambutol hydrochloride    | 6  | 20 | 1        | -1.5  | 0.5   | -0.5 |             |
| ethambutol hydrochloride    | 4  | 14 | 1        | 0.2   | -0.6  | 0.7  |             |
| ethambutol                  | 4  | 20 | 1        | 0.2   | 0.0   | 0.0  |             |
| ethionamide                 | 4  | 24 | 1        | -2.9  | -0.2  | 0.0  |             |
| ethionamide                 | 3  | 20 | 1        | 0.1   | -1.0  | 0.4  |             |
| ethionamide                 | 4  | 24 | 1        | 0.1   | -0.9  | 0.0  |             |
| fleroxacin                  | 4  | 11 | 2771     | 7.0   | -1.4  | 18.0 | very strong |
| florfenicol                 | 4  | 11 | complete | 7.1   | -1.8  | 17.9 | very strong |
| florfenicol                 | 4  | 11 | complete | 9.0   | -5.0  | 8.2  | very strong |
| florfenicol                 | 4  | 11 | complete | 6.5   | -2.6  | 1.8  | very strong |
| flucloxacillin sodium       | 4  | 8  | 1        | -0.5  | -0.6  | 0.2  |             |
| flumequine                  | 5  | 20 | complete | 10.7  | 0.3   | -0.3 | very strong |
| flumequine                  | 4  | 15 | complete | 22.5  | -4.2  | 15.0 | very strong |
| flumequine                  | 4  | 15 | complete | 12.8  | -1.9  | 1.2  | very strong |
| fluorouracil                | 4  | 31 | 5        | 6.7   | -2.9  | 14.4 | weak        |
| fluorouracil                | 3  | 20 | 6        | 10.3  | -0.5  | 0.0  | weak        |
| 5-fluorouracil              | 3  | 20 | 4        | 8.7   | -1.0  | 7.5  | detectable  |
| 5-fluorouracil              | 3  | 20 | 5        | 7.6   | -3.0  | 2.5  | weak        |
| 5-fluorouracil              | 4  | 31 | 11       | 6.4   | -1.5  | 14.8 | weak        |
| fosfomycin calcium          | 4  | 23 | 1        | -0.4  | -1.2  | 0.0  |             |
| fosfomycin                  | 4  | 20 | 1        | -0.6  | -0.2  | 0.0  |             |
| fosfosal                    | 4  | 20 | 1        | -3.5  | -0.9  | 0.8  |             |
| furazolidone                | 4  | 18 | 2        | 2.9   | -1.2  | 3.3  |             |
| furazolidone                | 4  | 18 | 2        | 2.5   | -0.1  | 0.0  |             |
| furazolidone                | 5  | 20 | 3        | 8.2   | -1.9  | 0.9  | detectable  |
| fusidic acid sodium salt    | 4  | 7  | 273      | 9.5   | -1.2  | 1.0  | very strong |
| fusidic acid sodium         | 11 | 20 | 3804     | 9.8   | -3.9  | 2.0  | very strong |
| fusidic acid                | 4  | 8  | 24       | 8.0   | -2.9  | 15.6 | mod         |

|                            |    |    |          |      |       |      |             |
|----------------------------|----|----|----------|------|-------|------|-------------|
| fusidic acid               | 10 | 20 | 38       | 12.3 | -2.5  | 1.5  | mod         |
| gatifloxacin               | 4  | 11 | 281      | 8.9  | -4.7  | 8.8  | very strong |
| gatifloxacin               | 8  | 20 | 5243     | 9.6  | -2.2  | 1.6  | very strong |
| gatifloxacin               | 8  | 20 | complete | 11.9 | -4.5  | 12.0 | very strong |
| gatifloxacin               | 4  | 11 | complete | 7.1  | -1.9  | 18.4 | very strong |
| gemifloxacin mesylate      | 10 | 20 | 599      | 9.5  | -2.7  | 1.3  | very strong |
| gemifloxacin mesylate      | 4  | 8  | 680      | 8.9  | -3.3  | 8.4  | very strong |
| gentamicin sulfate         | 12 | 20 | 1        | -1.2 | -1.0  | 0.7  |             |
| gentamicin sulfate         | 4  | 7  | 1        | -0.3 | -2.3  | 2.2  |             |
| gentamicine sulfate        | 4  | 3  | 1        | 3.1  | -2.1  | 1.1  | detectable  |
| gentamycin sulfate         | 4  | 8  | 1        | -1.4 | -0.8  | 0.7  |             |
| gramicidin                 | 4  | 4  | 101      | 8.3  | 21.8  | -9.5 | toxic       |
| hetacillin potassium       | 9  | 20 | 1        | -0.8 | -0.4  | 0.0  |             |
| hetacillin potassium       | 4  | 9  | 1        | 0.1  | -3.1  | 3.4  |             |
| hinokitiol                 | 10 | 61 | 594      | 11.3 | -2.4  | 13.5 | very strong |
| ikarugamycin               | 10 | 21 | 1        | 2.9  | 34.3  | -4.2 | toxic       |
| imipenem monohydrate       | 6  | 20 | 1        | -0.8 | -2.4  | 0.2  |             |
| imipenem                   | 4  | 13 | 1        | -1.5 | 0.2   | -1.3 |             |
| imipenem                   | 4  | 13 | 1        | -0.1 | 0.7   | -0.7 |             |
| indirubin-3'-monoxime      | 10 | 36 | 1        | 3.0  | -10.4 | 10.6 |             |
| indirubin-3'-oxime         | 6  | 20 | 1        | 1.1  | -21.0 | 20.8 |             |
| indirubin-3'-oxime         | 6  | 20 | 1        | 6.6  | -18.0 | 10.1 | detectable  |
| indirubin                  | 10 | 38 | 1        | -0.3 | -3.2  | 3.3  |             |
| isoniazid                  | 3  | 20 | 1        | -0.6 | -0.7  | 1.4  |             |
| isoniazid                  | 4  | 29 | 1        | -3.4 | -1.1  | 1.0  |             |
| isoniazid                  | 3  | 20 | 1        | -2.0 | -0.4  | 0.2  |             |
| isoniazid                  | 4  | 29 | 1        | -0.2 | -0.8  | 1.1  |             |
| isoniazid                  | 4  | 29 | 1        | 2.2  | -0.5  | 0.0  |             |
| josamycin                  | 4  | 5  | complete | 12.9 | -3.3  | 10.6 | very strong |
| josamycin                  | 4  | 5  | complete | 12.9 | -2.3  | 2.3  | very strong |
| kanamycin a sulfate        | 12 | 20 | 1        | -1.4 | -0.3  | 0.1  |             |
| kanamycin a sulfate        | 4  | 7  | 1        | -0.7 | -2.1  | 0.3  |             |
| kanamycin a sulfate        | 4  | 7  | 1        | 0.1  | -0.7  | 0.0  |             |
| kasugamycin hydrochloride  | 8  | 20 | 1        | 0.7  | -1.3  | 0.5  |             |
| kasugamycin                | 4  | 11 | 1        | -1.9 | 0.0   | 0.0  |             |
| kitasamycin                | 17 | 20 | complete | 12.3 | -3.7  | 15.2 | very strong |
| lasalocid sodium salt      | 4  | 7  | 1        | -2.7 | -0.9  | 0.6  |             |
| lasalocid sodium           | 12 | 20 | 1        | -2.4 | 1.3   | -1.3 |             |
| levofloxacin hcl           | 4  | 11 | complete | 7.1  | -1.5  | 18.1 | very strong |
| levofloxacin               | 4  | 11 | 1057     | 8.9  | -4.7  | 8.1  | very strong |
| levofloxacin               | 7  | 20 | 1609     | 9.5  | -2.9  | 2.9  | very strong |
| levofloxacin               | 7  | 20 | complete | 12.3 | -4.5  | 15.3 | very strong |
| lincomycin hydrochloride   | 9  | 20 | 1        | -3.4 | 0.4   | -0.4 |             |
| lincomycin hydrochloride   | 4  | 9  | 1        | -0.4 | 1.8   | 0.3  |             |
| lincomycin hydrochloride   | 4  | 9  | 1        | -1.0 | -0.9  | 0.5  |             |
| lincomycin                 | 4  | 10 | 1        | -2.3 | -1.3  | 0.0  |             |
| linezolid                  | 4  | 12 | 2        | 4.7  | -2.9  | 7.5  | detectable  |
| linezolid                  | 7  | 20 | 4        | 16.0 | -3.4  | 9.9  | detectable  |
| linezolid                  | 7  | 20 | 15       | 11.4 | -2.1  | 12.8 | weak        |
| lomefloxacin hcl           | 4  | 11 | complete | 7.1  | -1.6  | 18.2 | very strong |
| lomefloxacin hydrochloride | 8  | 20 | complete | 10.7 | -2.5  | 1.7  | very strong |
| lomefloxacin hydrochloride | 8  | 20 | complete | 8.7  | -4.2  | 7.5  | very strong |
| lomefloxacin hydrochloride | 4  | 10 | complete | 22.5 | -2.3  | 15.7 | very strong |
| lomefloxacin hydrochloride | 4  | 10 | complete | 12.9 | -3.8  | 2.9  | very strong |
| lymecycline                | 4  | 7  | 1        | 1.6  | -1.2  | 0.1  |             |
| mafenide hydrochloride     | 4  | 20 | 1        | -3.0 | 0.0   | 0.0  |             |
| mafenide hydrochloride     | 4  | 18 | 1        | -1.1 | -0.8  | 0.2  |             |
| mafenide hydrochloride     | 4  | 18 | 1        | 0.6  | -0.8  | 0.0  |             |
| mecillinam                 | 7  | 20 | 1        | -1.9 | -1.3  | 1.6  |             |

|                                   |    |    |          |       |      |      |             |
|-----------------------------------|----|----|----------|-------|------|------|-------------|
| meclocycline sulfosalicylate      | 14 | 20 | 1        | -11.5 | -1.2 | 0.2  |             |
| meclocycline sulfosalicylate      | 4  | 6  | 2        | 4.5   | -0.6 | 0.0  | detectable  |
| meclocycline sulfosalicylate      | 4  | 6  | 2        | 13.0  | -4.8 | 12.6 | detectable  |
| meropenem                         | 8  | 20 | 1        | -2.0  | -0.7 | 1.3  |             |
| meropenem                         | 4  | 10 | 1        | -0.5  | -0.8 | 0.4  |             |
| meropenem                         | 4  | 10 | 1        | 0.9   | -2.6 | 1.5  |             |
| metampicillin sodium salt         | 4  | 10 | 1        | 2.3   | -0.7 | 0.1  |             |
| metampicillin sodium              | 8  | 20 | 1        | -2.2  | -1.1 | 1.0  |             |
| methacycline hydrochloride        | 10 | 20 | 1        | -7.8  | -2.0 | 1.1  |             |
| methacycline hydrochloride        | 4  | 8  | 1        | -8.2  | -2.4 | 2.7  |             |
| methacycline hydrochloride        | 4  | 8  | 45       | 7.7   | -1.4 | 0.8  | mod         |
| methicillin sodium                | 8  | 20 | 1        | -2.3  | 0.3  | -0.3 |             |
| methicillin sodium                | 4  | 10 | 1        | -0.2  | -1.0 | 1.8  |             |
| metronidazole                     | 3  | 20 | 1        | -2.7  | 1.9  | -1.9 |             |
| metronidazole                     | 4  | 23 | 1        | -0.7  | -1.0 | 1.5  |             |
| metronidazole                     | 4  | 23 | 1        | 0.0   | -3.6 | 2.9  |             |
| metronidazole                     | 4  | 23 | 1        | 0.6   | -0.3 | 0.0  |             |
| minocycline hcl                   | 4  | 9  | 186      | 7.0   | -1.4 | 17.7 | strong      |
| minocycline hydrochloride         | 10 | 20 | 610      | 8.6   | -4.4 | 7.8  | very strong |
| minocycline hydrochloride         | 10 | 20 | 1339     | 11.9  | -2.1 | 11.2 | very strong |
| minocycline hydrochloride         | 4  | 8  | 2889     | 8.4   | -4.6 | 15.7 | very strong |
| minocycline hydrochloride         | 4  | 8  | complete | 12.8  | -1.8 | 0.4  | very strong |
| mitomycin c                       | 7  | 20 | 1433     | 7.9   | -1.8 | 0.0  | very strong |
| mitomycin c                       | 4  | 12 | complete | 12.2  | -3.8 | 14.1 | very strong |
| mitomycin c                       | 4  | 12 | complete | 8.4   | -4.1 | 17.1 | very strong |
| mitomycin c                       | 10 | 30 | complete | 11.4  | -2.2 | 11.7 | very strong |
| monensin sodium                   | 14 | 20 | 1        | -5.1  | 2.8  | -2.8 |             |
| monensin sodium                   | 4  | 6  | 1        | -6.2  | 3.1  | -5.6 | toxic       |
| monensin sodium salt              | 4  | 6  | 1        | -3.9  | 3.3  | -3.3 | toxic       |
| monensin sodium                   | 10 | 14 | 1        | -2.3  | -1.0 | -0.7 |             |
| moxalactam disodium salt          | 4  | 7  | 2        | 2.5   | 0.4  | -0.4 |             |
| moxalactam disodium               | 11 | 20 | 1        | -4.1  | 0.6  | -0.6 |             |
| moxalactam disodium               | 4  | 7  | 1        | 0.2   | -1.2 | 0.3  |             |
| moxifloxacin hcl                  | 9  | 20 | complete | 12.3  | -4.7 | 15.4 | very strong |
| moxifloxacin hydrochloride        | 4  | 9  | 1187     | 8.9   | -4.9 | 8.6  | very strong |
| moxifloxacin hydrochloride        | 9  | 20 | 1359     | 9.5   | -2.5 | 1.9  | very strong |
| mupirocin                         | 10 | 20 | 38       | 11.6  | -1.5 | 10.5 | mod         |
| nadifloxacin                      | 4  | 11 | complete | 7.1   | -1.8 | 18.5 | very strong |
| nadifloxacin                      | 4  | 11 | complete | 7.9   | -1.2 | 1.1  | very strong |
| nafcillin sodium salt monohydrate | 4  | 9  | 1        | -0.9  | -1.0 | 0.0  |             |
| nafcillin sodium                  | 9  | 20 | 1        | -4.5  | 2.4  | -2.4 |             |
| nafcillin sodium                  | 4  | 9  | 1        | -0.1  | -2.7 | 1.5  |             |
| nalidixic acid sodium             | 5  | 20 | complete | 8.7   | -1.6 | 6.2  | very strong |
| nalidixic acid                    | 5  | 20 | 1        | -2.5  | -0.7 | 0.4  |             |
| nalidixic acid                    | 4  | 17 | 1        | 4.3   | -0.4 | 3.1  | detectable  |
| neomycin sulfate                  | 4  | 7  | 1        | -2.5  | -0.9 | 0.4  |             |
| neomycin sulfate                  | 4  | 6  | 1        | -0.2  | -2.9 | 0.2  |             |
| neomycin sulfate                  | 4  | 6  | 1        | 1.0   | -1.6 | 0.6  |             |
| neomycin sulfate                  | 14 | 20 | 2        | 3.0   | -2.2 | 0.7  |             |
| netilmicin sulfate                | 4  | 6  | 1        | -0.1  | -1.0 | 0.9  |             |
| nifuroxazide                      | 4  | 15 | 1        | -0.6  | -2.7 | 0.8  |             |
| nifursol                          | 7  | 20 | 1        | 0.5   | -3.1 | 1.5  |             |
| nifurtimox                        | 4  | 14 | 1        | 1.1   | -4.3 | 3.8  |             |
| nitrofurantoin                    | 5  | 20 | 2        | 6.0   | -0.3 | 0.5  | detectable  |
| nitrofurantoin                    | 5  | 20 | 1        | 1.4   | 1.2  | -1.2 |             |
| nitrofurantoin                    | 4  | 17 | 6        | 10.5  | -1.8 | 1.3  | weak        |
| nitrofurantoin                    | 4  | 17 | 6        | 7.0   | -2.3 | 9.4  | weak        |
| nitrofurazone                     | 4  | 20 | 1        | 0.0   | -1.7 | 1.5  |             |
| nitrofurazone                     | 4  | 20 | 1        | 1.6   | -2.8 | 2.7  |             |

|                                                                  |    |    |          |      |      |      |             |
|------------------------------------------------------------------|----|----|----------|------|------|------|-------------|
| norfloxacin                                                      | 4  | 13 | 206      | 7.0  | -1.6 | 18.2 | strong      |
| norfloxacin                                                      | 4  | 13 | 257      | 12.8 | -3.8 | 2.6  | strong      |
| norfloxacin                                                      | 6  | 20 | 946      | 12.7 | -2.2 | 1.8  | very strong |
| norfloxacin                                                      | 4  | 13 | complete | 8.4  | -5.1 | 15.9 | very strong |
| novobiocin na                                                    | 4  | 7  | 1        | 1.3  | -1.3 | 5.7  |             |
| novobiocin sodium salt                                           | 4  | 6  | 15       | 6.0  | -0.8 | 0.0  | weak        |
| novobiocin sodium                                                | 13 | 20 | 3        | 8.1  | -1.4 | 0.1  | detectable  |
| novobiocin sodium                                                | 4  | 6  | 19       | 7.9  | -3.1 | 15.8 | mod         |
| ofloxacin                                                        | 7  | 20 | 799      | 8.7  | -3.4 | 7.4  | very strong |
| ofloxacin                                                        | 4  | 11 | 323      | 7.0  | -1.8 | 18.3 | very strong |
| ofloxacin                                                        | 7  | 20 | complete | 10.7 | -5.1 | 4.5  | very strong |
| ofloxacin                                                        | 4  | 11 | complete | 22.5 | -4.1 | 15.3 | very strong |
| ofloxacin                                                        | 4  | 11 | complete | 12.9 | -3.5 | 1.8  | very strong |
| oleandomycin phosphate                                           | 16 | 20 | 1        | -4.6 | -0.9 | 0.0  |             |
| oleandomycin phosphate                                           | 4  | 5  | 1        | -0.5 | -1.7 | 1.1  |             |
| oleandomycin phosphate                                           | 4  | 5  | 1        | -0.5 | -3.5 | 2.1  |             |
| orbifloxacin                                                     | 8  | 20 | 2        | 3.3  | -2.6 | 0.8  | detectable  |
| ormetoprim                                                       | 5  | 20 | 10       | 10.9 | -2.4 | 13.1 | weak        |
| ornidazole                                                       | 4  | 18 | 1        | -0.2 | -2.3 | 0.4  |             |
| ornidazole                                                       | 4  | 18 | 1        | 1.0  | -1.4 | 0.8  |             |
| oxacillin sodium monohydrate                                     | 4  | 10 | 1        | -1.8 | -1.0 | 1.3  |             |
| oxacillin sodium                                                 | 8  | 20 | 1        | -6.0 | -0.7 | 0.0  |             |
| oxacillin sodium                                                 | 4  | 9  | 1        | -0.7 | -1.5 | 1.8  |             |
| oxolinic acid                                                    | 5  | 20 | complete | 8.7  | -2.6 | 7.5  | very strong |
| oxolinic acid                                                    | 5  | 20 | 274      | 10.7 | -1.5 | 0.7  | very strong |
| oxolinic acid                                                    | 4  | 15 | 362      | 12.8 | -2.7 | 2.3  | very strong |
| oxolinic acid                                                    | 4  | 15 | complete | 22.5 | -4.7 | 15.3 | very strong |
| oxytetracycline dihydrate                                        | 4  | 8  | 2        | 6.3  | -2.0 | 1.7  | detectable  |
| oxytetracycline hydrochloride                                    | 10 | 20 | 66       | 11.7 | -3.4 | 11.4 | strong      |
| oxytetracycline                                                  | 4  | 8  | 2        | 3.9  | -1.9 | 11.9 | detectable  |
| oxytetracycline                                                  | 10 | 20 | 4        | 9.2  | -2.4 | 2.2  | detectable  |
| paromomycin sulfate                                              | 14 | 20 | 1        | -0.7 | -1.4 | 0.1  |             |
| paromomycin sulfate                                              | 14 | 20 | 1        | -0.9 | -1.8 | 0.7  |             |
| paromomycin sulfate                                              | 4  | 6  | 1        | -0.4 | -0.8 | 0.1  |             |
| pazufloxacin mesylate                                            | 8  | 20 | 1        | 0.8  | -0.9 | 0.0  |             |
| pazufloxacin                                                     | 4  | 13 | 553      | 7.0  | -2.0 | 18.6 | very strong |
| pazufloxacin                                                     | 6  | 20 | 809      | 12.3 | -4.3 | 15.3 | very strong |
| pefloxacin mesylate                                              | 9  | 20 | 2811     | 12.3 | -4.6 | 15.6 | very strong |
| pefloxacin mesylate                                              | 4  | 9  | 447      | 8.9  | -2.1 | 8.3  | very strong |
| pefloxacin mesylate                                              | 9  | 20 | 1169     | 9.5  | -1.8 | 1.0  | very strong |
| pefloxacin mesylate                                              | 4  | 12 | 1450     | 7.0  | -1.8 | 18.2 | very strong |
| penicillin g potassium                                           | 4  | 11 | 1        | -0.1 | -1.4 | 2.2  |             |
| penicillin v potassium                                           | 4  | 11 | 1        | -0.7 | -1.2 | 3.5  |             |
| penicillin v potassium                                           | 8  | 20 | 1        | -5.2 | -0.6 | 0.2  |             |
| penicillin v potassium                                           | 4  | 10 | 1        | -0.3 | -1.6 | 2.2  |             |
| penicillin v                                                     | 7  | 20 | 1        | 0.3  | -1.6 | 0.7  |             |
| 6-2-ethoxy-1-naphthamido-<br>penicillin sodium salt              | 9  | 20 | 1        | 1.8  | -0.6 | 0.6  |             |
| pfizerpen                                                        | 7  | 20 | 1        | -0.3 | 0.4  | -0.1 |             |
| phenethicillin potassium salt                                    | 4  | 10 | 1        | 0.8  | 0.0  | 0.0  |             |
| phenethicillin potassium                                         | 4  | 10 | 1        | 0.8  | -2.7 | 2.6  |             |
| phenyl aminosalicylate                                           | 4  | 17 | 1        | 0.8  | -1.7 | 1.8  |             |
| phosphomycin disodium;<br>fosfomycin; phosphonomycin; mk-<br>955 | 4  | 20 | 1        | -0.6 | -1.2 | 0.0  |             |
| pipemidic acid                                                   | 6  | 20 | 1        | -1.6 | -0.1 | 0.0  |             |
| pipemidic acid                                                   | 4  | 13 | 1        | 0.8  | 0.5  | -0.5 |             |
| piperacillin sodium salt                                         | 11 | 20 | 1        | -0.9 | 0.0  | 0.0  |             |
| piperacillin sodium salt                                         | 4  | 7  | 1        | 0.1  | 1.4  | -1.4 |             |



|                                            |    |    |          |      |       |       |             |
|--------------------------------------------|----|----|----------|------|-------|-------|-------------|
| piperacillin sodium                        | 11 | 20 | 1        | -2.1 | -1.7  | 1.2   |             |
| piperacillin sodium                        | 4  | 7  | 1        | -1.0 | -1.6  | 0.5   |             |
| piperacillin                               | 4  | 8  | 1        | -0.8 | -1.4  | 3.2   |             |
| piromidic acid                             | 6  | 20 | 1        | -2.5 | -1.6  | 1.1   |             |
| piromidic acid                             | 4  | 14 | 1        | 0.8  | 0.8   | -0.8  |             |
| pivampicillin                              | 4  | 9  | 1        | 0.4  | 0.2   | -0.2  |             |
| pivmecillinam hydrochloride                | 4  | 8  | 1        | 1.3  | -1.2  | 0.9   |             |
| polymyxin b sulfate                        | 26 | 20 | 1        | -4.1 | 5.8   | -5.8  | toxic       |
| polymyxin b sulfate                        | 4  | 3  | 1        | -1.6 | 4.6   | -2.2  | toxic       |
| prothionamide                              | 4  | 20 | 1        | -3.1 | -0.3  | 0.0   |             |
| prothionamide                              | 4  | 22 | 1        | 0.1  | -0.8  | 1.2   |             |
| prulifloxacin                              | 9  | 20 | 1        | 1.4  | -3.6  | 3.0   |             |
| puromycin dihydrochloride                  | 4  | 8  | 1        | -1.3 | 2.7   | -0.5  |             |
| puromycin dihydrochloride                  | 4  | 7  | 1        | -1.1 | 13.3  | -13.3 | toxic       |
| puromycin hydrochloride                    | 11 | 20 | 1        | -3.8 | 1.7   | -1.7  |             |
| puromycin hydrochloride                    | 4  | 7  | 1        | -0.3 | 0.2   | 0.0   |             |
| puromycin dihydrochloride                  | 10 | 19 | 87       | 11.2 | 16.7  | -2.7  | toxic       |
| pyrazinamide                               | 2  | 20 | 1        | -3.9 | 0.5   | -0.5  |             |
| pyrazinamide                               | 4  | 32 | 1        | 1.5  | -1.8  | 2.4   |             |
| pyrazinamide                               | 4  | 32 | 1        | 0.3  | -0.4  | 0.0   |             |
| pyrazinecarboxamide                        | 6  | 20 | 1        | -0.4 | -1.0  | 1.0   |             |
| pyrazinecarboxamide                        | 2  | 20 | 1        | 1.3  | -0.1  | -0.2  |             |
| ramoplanin                                 | 51 | 20 | 1        | -0.3 | 2.4   | -2.4  |             |
| ribostamycin sulfate salt                  | 4  | 7  | 1        | 0.8  | 0.0   | 0.0   |             |
| ribostamycin sulfate                       | 11 | 20 | 1        | -0.8 | -1.2  | 0.1   |             |
| rifabutin                                  | 17 | 20 | 475      | 11.8 | -7.2  | 12.9  | very strong |
| rifabutin                                  | 17 | 20 | complete | 12.3 | -8.2  | 17.0  | very strong |
| rifabutin                                  | 4  | 5  | complete | 7.9  | -6.6  | 5.8   | very strong |
| rifampicin                                 | 16 | 20 | complete | 11.9 | -13.7 | 14.8  | very strong |
| rifampicin                                 | 4  | 5  | complete | 12.2 | -8.7  | 15.7  | very strong |
| rifampicin                                 | 4  | 5  | complete | 9.5  | -11.9 | 11.2  | very strong |
| rifampin                                   | 16 | 20 | complete | 12.7 | -12.7 | 12.6  | very strong |
| rifampin                                   | 4  | 5  | complete | 22.5 | -16.6 | 18.3  | very strong |
| rifamycin sv                               | 4  | 6  | 229      | 7.0  | -2.2  | 17.3  | strong      |
| rifapentine                                | 18 | 20 | 1680     | 11.9 | -11.6 | 14.2  | very strong |
| rifapentine                                | 18 | 20 | complete | 12.3 | -12.0 | 18.3  | very strong |
| rifaximin                                  | 16 | 20 | complete | 12.3 | -6.4  | 16.2  | very strong |
| rifaximin                                  | 4  | 5  | complete | 9.0  | -6.1  | 8.6   | very strong |
| rolitetracycline                           | 4  | 8  | 1        | -0.3 | -2.3  | 2.2   |             |
| rolitetracycline                           | 4  | 8  | 1        | 0.6  | -1.6  | 0.5   |             |
| roxithromycin                              | 4  | 5  | 5320     | 6.5  | -2.9  | 1.9   | very strong |
| roxithromycin                              | 17 | 20 | complete | 9.6  | -2.2  | 1.2   | very strong |
| roxithromycin                              | 4  | 5  | complete | 7.0  | -1.5  | 18.1  | very strong |
| roxithromycin                              | 4  | 5  | complete | 8.9  | -3.7  | 8.7   | very strong |
| rufloxacin hcl                             | 7  | 20 | complete | 12.3 | -3.0  | 15.1  | very strong |
| rufloxacin hydrochloride                   | 7  | 20 | 1        | -0.7 | -2.1  | 1.8   |             |
| rufloxacin                                 | 4  | 11 | complete | 7.1  | -1.5  | 17.9  | very strong |
| salinomycin, sodium                        | 15 | 20 | 1        | -4.5 | 0.6   | -0.6  |             |
| sarafloxacin hcl                           | 4  | 10 | complete | 7.1  | -1.6  | 18.5  | very strong |
| sarafloxacin hydrochloride                 | 8  | 20 | 1003     | 9.5  | -2.2  | 2.0   | very strong |
| sarafloxacin hydrochloride                 | 4  | 9  | complete | 9.0  | -4.1  | 8.8   | very strong |
| sisomicin sulfate                          | 11 | 20 | 1        | -3.0 | 0.9   | -0.9  |             |
| sisomicin sulfate                          | 4  | 7  | 1        | 0.0  | -0.4  | 0.0   |             |
| sisomicin sulfate                          | 4  | 7  | 1        | 0.8  | -1.8  | 0.9   |             |
| sparfloxacin                               | 4  | 10 | complete | 7.1  | -1.9  | 18.2  | very strong |
| spectinomycin dihydrochloride pentahydrate | 7  | 20 | 1        | -0.3 | -1.7  | 3.4   |             |
| spectinomycin dihydrochloride              | 4  | 10 | 1        | 1.2  | 0.3   | -0.3  |             |
| spectinomycin hydrochloride                | 4  | 10 | 1        | -2.0 | -1.7  | 2.1   |             |

|                             |    |    |   |      |      |      |            |
|-----------------------------|----|----|---|------|------|------|------------|
| spectinomycin hydrochloride | 8  | 20 | 1 | -0.8 | 0.3  | -0.3 |            |
| spectinomycin               | 4  | 12 | 1 | -1.6 | -1.5 | 0.6  |            |
| spiramycin                  | 17 | 20 | 1 | -4.3 | -0.9 | 0.0  |            |
| spiramycin                  | 4  | 5  | 1 | -1.5 | 1.3  | -1.3 |            |
| spiramycin                  | 4  | 5  | 1 | 0.2  | -2.7 | 0.0  |            |
| streptomycin sulfate        | 14 | 20 | 1 | -2.7 | -0.8 | 0.3  |            |
| streptomycin sulfate        | 4  | 7  | 1 | -0.9 | -0.6 | 0.0  |            |
| streptomycin sulfate        | 4  | 6  | 1 | 0.0  | -2.4 | 1.3  |            |
| streptomycin sulfate        | 4  | 3  | 1 | 0.6  | -0.3 | 0.0  |            |
| succinylsulfathiazole       | 7  | 20 | 1 | -3.7 | -1.3 | 0.0  |            |
| succinylsulfathiazole       | 4  | 11 | 1 | 0.3  | -1.2 | 2.2  |            |
| succinylsulfathiazole       | 4  | 11 | 1 | -0.6 | -0.7 | 0.3  |            |
| sucralfate sodium           | 4  | 2  | 1 | -0.4 | -2.6 | 0.0  |            |
| sulfactam                   | 4  | 17 | 1 | 0.6  | -1.0 | 3.5  |            |
| sulfabenzamide              | 4  | 14 | 1 | -1.9 | -2.4 | 2.6  |            |
| sulfabenzamide              | 6  | 20 | 1 | -0.6 | -1.1 | 0.4  |            |
| sulfabenzamide              | 4  | 14 | 2 | 2.2  | -1.4 | 0.8  |            |
| sulfacarbamide              | 4  | 20 | 1 | -0.8 | -1.3 | 0.4  |            |
| sulfacetamide sodic hydrate | 4  | 16 | 1 | -2.1 | 0.0  | 0.0  |            |
| sulfacetamide               | 4  | 20 | 1 | -2.1 | 0.0  | 0.0  |            |
| sulfacetamide               | 4  | 20 | 1 | -3.8 | -1.6 | 1.1  |            |
| sulfacetamide               | 4  | 19 | 1 | -0.3 | -2.8 | 3.9  |            |
| sulfachloropyridazine       | 4  | 14 | 4 | 4.7  | -0.7 | 0.1  | detectable |
| sulfachloropyridazine       | 6  | 20 | 1 | 0.6  | 0.2  | -0.2 |            |
| sulfachloropyridazine       | 4  | 14 | 2 | 9.7  | -3.6 | 7.9  | detectable |
| sulfadiazine                | 5  | 20 | 1 | 2.4  | -0.2 | 0.0  |            |
| sulfadiazine                | 4  | 16 | 1 | 1.7  | -0.8 | 2.3  |            |
| sulfadiazine                | 4  | 16 | 1 | 5.9  | -3.7 | 6.3  | detectable |
| sulfadiazine                | 4  | 16 | 2 | 5.8  | -1.5 | 0.0  | detectable |
| sulfadimethoxine            | 4  | 13 | 2 | 3.1  | -1.0 | 3.5  | detectable |
| sulfadimethoxine            | 4  | 13 | 2 | 11.4 | -2.6 | 8.9  | detectable |
| sulfadimethoxine            | 6  | 20 | 2 | 5.7  | -0.4 | 0.0  | detectable |
| sulfadimethoxine            | 4  | 13 | 6 | 5.3  | 0.5  | -0.5 | weak       |
| sulfadoxine                 | 4  | 13 | 1 | 0.1  | -0.8 | 0.8  |            |
| sulfadoxine                 | 4  | 13 | 2 | 4.2  | -0.9 | 3.2  | detectable |
| sulfadoxine                 | 4  | 13 | 3 | 4.6  | -2.3 | 1.6  | detectable |
| sulfaguanidine              | 4  | 20 | 1 | -2.9 | -0.3 | 0.0  |            |
| sulfaguanidine              | 4  | 19 | 1 | -1.8 | -1.1 | 0.0  |            |
| sulfaguanidine              | 4  | 19 | 1 | 0.8  | -1.6 | 0.9  |            |
| sulfamerazine               | 5  | 20 | 1 | 0.6  | 0.3  | -0.3 |            |
| sulfamerazine               | 4  | 15 | 1 | 6.0  | -2.9 | 5.5  | detectable |
| sulfamerazine               | 4  | 15 | 3 | 4.0  | -0.1 | 0.0  | detectable |
| sulfameter                  | 6  | 20 | 1 | 0.8  | 0.6  | -0.6 |            |
| sulfameter                  | 4  | 14 | 2 | 9.6  | -1.7 | 7.2  | detectable |
| sulfameter                  | 4  | 14 | 4 | 4.7  | 0.3  | -0.3 | detectable |
| sulfamethazine sodium salt  | 4  | 13 | 2 | 2.9  | -0.6 | 0.4  |            |
| sulfamethazine              | 6  | 20 | 1 | -1.6 | -0.1 | 0.0  |            |
| sulfamethazine              | 4  | 14 | 1 | 4.8  | -2.0 | 4.9  | detectable |
| sulfamethizole              | 5  | 20 | 2 | 3.4  | -0.9 | 0.5  | detectable |
| sulfamethizole              | 4  | 15 | 2 | 11.3 | -3.1 | 8.6  | detectable |
| sulfamethizole              | 4  | 15 | 4 | 4.6  | -0.9 | 0.7  | detectable |
| sulfamethoxazole            | 4  | 16 | 2 | 13.0 | -1.1 | 7.7  | detectable |
| sulfamethoxazole            | 4  | 16 | 3 | 8.1  | -2.3 | 0.0  | detectable |
| sulfamethoxazole            | 5  | 20 | 4 | 7.5  | -2.1 | 1.8  | detectable |
| sulfamethoxypyridazine      | 6  | 20 | 1 | 0.2  | 0.6  | -0.6 |            |
| sulfamethoxypyridazine      | 4  | 14 | 2 | 7.1  | -3.4 | 6.7  | detectable |
| sulfamethoxypyridazine      | 4  | 14 | 3 | 4.4  | 0.7  | -0.7 | detectable |
| sulfamonomethoxine          | 4  | 14 | 3 | 13.2 | -2.7 | 9.4  | detectable |
| sulfamonomethoxine          | 6  | 20 | 4 | 7.9  | -0.9 | 0.4  | detectable |

|                              |    |    |          |      |      |      |             |
|------------------------------|----|----|----------|------|------|------|-------------|
| sulfamonomethoxine           | 4  | 14 | 9        | 5.7  | -0.9 | 0.3  | weak        |
| sulfanilamide                | 3  | 20 | 1        | -2.8 | 1.6  | -1.6 |             |
| sulfanilamide                | 4  | 23 | 1        | 1.1  | -2.2 | 2.0  |             |
| sulfanilamide                | 4  | 23 | 1        | 0.3  | 0.1  | -0.1 |             |
| sulfanilate zinc             | 4  | 10 | 1        | -0.1 | -2.8 | 0.1  |             |
| sulfanitran                  | 7  | 20 | 1        | -0.3 | -1.8 | 0.7  |             |
| sulfanitran                  | 4  | 12 | 1        | 0.8  | -3.3 | 1.7  |             |
| sulfaphenazole               | 6  | 20 | 4        | 14.3 | -1.4 | 7.0  | detectable  |
| sulfaphenazole               | 6  | 20 | 3        | 6.3  | -0.9 | 0.0  | detectable  |
| sulfaphenazole               | 4  | 13 | 5        | 10.0 | -2.5 | 1.8  | weak        |
| sulfapyridine                | 5  | 20 | 1        | 1.2  | 0.0  | 0.0  |             |
| sulfapyridine                | 4  | 16 | 1        | 3.0  | -1.2 | 4.1  |             |
| sulfapyridine                | 4  | 16 | 2        | 2.4  | -1.8 | 0.0  |             |
| sulfaquinoxaline sodium salt | 4  | 12 | 3        | 4.4  | -1.1 | 0.1  | detectable  |
| sulfaquinoxaline sodium      | 4  | 12 | 2        | 9.9  | -1.5 | 5.9  | detectable  |
| sulfathiazole                | 4  | 16 | 1        | 5.1  | -0.4 | 4.6  | detectable  |
| sulfathiazole                | 5  | 20 | 2        | 4.8  | -0.8 | 0.0  | detectable  |
| sulfathiazole                | 4  | 16 | 3        | 8.0  | -1.4 | 0.9  | detectable  |
| sulfisoxazole acetyl         | 4  | 13 | 1        | -0.5 | -1.6 | 0.5  |             |
| sulfisoxazole                | 5  | 20 | 1        | 1.7  | 0.0  | 0.0  |             |
| sulfisoxazole                | 4  | 15 | 2        | 9.3  | -0.8 | 8.3  | detectable  |
| sulfisoxazole                | 4  | 15 | 3        | 6.2  | -1.1 | 0.0  | detectable  |
| talampicillin hydrochloride  | 4  | 8  | 1        | 1.1  | -0.9 | 0.0  |             |
| tazobactam                   | 6  | 20 | 1        | 0.2  | -2.8 | 1.3  |             |
| teicoplanin                  | 4  | 2  | 1        | 1.6  | 0.8  | 0.2  |             |
| teliithromycin               | 16 | 20 | complete | 9.6  | -1.6 | 1.1  | very strong |
| teliithromycin               | 4  | 5  | complete | 12.9 | -2.7 | 10.0 | very strong |
| tetracycline hydrochloride   | 10 | 20 | 1        | -1.3 | -1.4 | 0.3  |             |
| tetracycline hydrochloride   | 4  | 8  | 3        | 13.8 | -2.0 | 10.4 | detectable  |
| tetracycline hydrochloride   | 4  | 8  | 4        | 9.5  | -1.9 | 0.2  | weak        |
| tetracycline                 | 4  | 9  | 1        | -1.6 | -0.6 | 1.1  |             |
| tetracycline                 | 9  | 20 | 1        | -0.9 | 0.0  | 0.0  |             |
| thiamphenicol glycinate      | 4  | 10 | 1        | 0.3  | -1.1 | 5.9  |             |
| thiamphenicol                | 7  | 20 | 1        | 0.2  | -1.9 | 1.7  |             |
| thiamphenicol                | 4  | 11 | 1        | 5.2  | -2.8 | 7.5  | detectable  |
| thiamphenicol                | 4  | 11 | 1        | 3.1  | -1.6 | 0.3  | detectable  |
| thiolactomycin               | 4  | 20 | 1        | 0.2  | -2.9 | 0.4  |             |
| thiostrepton                 | 4  | 2  | 9        | 8.0  | -4.4 | 8.3  | weak        |
| thiostrepton                 | 4  | 2  | 215      | 9.5  | -1.8 | 0.8  | strong      |
| ticarcillin disodium         | 9  | 20 | 1        | -1.3 | 1.8  | -1.8 |             |
| ticarcillin sodium           | 4  | 9  | 1        | -0.1 | 0.3  | -0.3 |             |
| tigecycline                  | 12 | 20 | 1        | 2.2  | -5.0 | 4.6  |             |
| tilmicosin                   | 4  | 5  | 1        | -1.4 | -1.4 | 0.8  |             |
| tinidazole                   | 5  | 20 | 1        | -2.6 | 1.0  | -1.0 |             |
| tinidazole                   | 4  | 16 | 1        | -2.2 | 2.7  | -2.7 |             |
| tinidazole                   | 4  | 16 | 1        | -1.0 | -0.6 | 1.5  |             |
| tinidazole                   | 4  | 16 | 1        | 2.0  | -4.2 | 3.5  |             |
| tobramycin (free base)       | 4  | 9  | 1        | 0.6  | -1.3 | 4.8  |             |
| tobramycin                   | 4  | 9  | 1        | 1.8  | -1.4 | 2.0  |             |
| tobramycin                   | 4  | 9  | 1        | 1.3  | -2.1 | 0.9  |             |
| tosufloxacin tosylate        | 12 | 20 | complete | 12.3 | -5.0 | 15.6 | very strong |
| tosufloxacin                 | 4  | 10 | complete | 7.1  | -1.8 | 18.4 | very strong |
| triclosan                    | 6  | 20 | 91       | 11.7 | -2.9 | 11.0 | strong      |
| triclosan                    | 4  | 14 | 55       | 8.8  | -1.4 | 7.6  | mod         |
| trimethoprim                 | 4  | 14 | 2        | 7.6  | -1.7 | 8.9  | detectable  |
| trimethoprim                 | 6  | 20 | 2        | 8.9  | -0.5 | 5.4  | detectable  |
| trimethoprim                 | 4  | 14 | 2        | 7.0  | -1.2 | 0.0  | detectable  |
| trimethoprim                 | 6  | 20 | 4        | 7.8  | -1.1 | 1.0  | detectable  |
| trimethoprim                 | 4  | 14 | 5        | 5.7  | -1.2 | 14.9 | weak        |

|                          |    |    |      |      |      |      |             |
|--------------------------|----|----|------|------|------|------|-------------|
| troleandomycin           | 4  | 5  | 1    | -5.6 | -1.9 | 5.3  |             |
| troleandomycin           | 4  | 5  | 1    | -2.8 | -1.8 | 0.0  |             |
| troleandomycin           | 16 | 20 | 4    | 7.7  | -0.1 | 0.0  | detectable  |
| troleandomycin           | 4  | 5  | 25   | 11.7 | -2.3 | 12.7 | mod         |
| trovafloxacin mesylate   | 10 | 20 | 1695 | 22.7 | -6.5 | 13.5 | very strong |
| tylosin tartrate         | 4  | 4  | 1    | 0.5  | -3.4 | 3.5  |             |
| tylosin tartrate         | 18 | 20 | 14   | 8.8  | -2.8 | 1.2  | weak        |
| tylosin tartrate         | 4  | 4  | 26   | 6.8  | -1.7 | 17.5 | mod         |
| vancomycin hydrochloride | 30 | 20 | 2    | 11.7 | -2.1 | 6.1  | detectable  |
| vancomycin hydrochloride | 30 | 20 | 1    | -0.5 | 0.1  | -0.1 |             |
| vancomycin hydrochloride | 4  | 3  | 1    | 0.1  | -2.4 | 3.1  |             |
| vancomycin hydrochloride | 4  | 3  | 1    | 0.9  | 0.0  | 0.0  |             |
| viomycin sulfate         | 4  | 5  | 1    | -0.9 | -1.8 | 0.4  |             |

*compound name*: note, some compounds were tested and therefore listed several times based on their presence in different bioactive screening libraries.

*µg/ml* and *µM*: final concentration of compound in screening wells.

*fold-reduction*: the reduction in luminescence relative to untreated control wells determined on day 2 of incubation. Fold reduction to a level equal to or below positive control wells (10µg/ml levofloxacin) was considered complete elimination.

*z-lux*: the z-score for reduction in luminescence of test wells compared to untreated controls determined on day two of infection.

*z-cytotox*: the z-score for cytotoxicity of test wells compared to 10µg/ml levofloxacin treated control wells on day 1 of infection, assessed based on increase in SYTOX Green fluorescence.

*z-antitox*: the z-score for cytopreservation of test wells compared to the negative controls wells on day 2, based on reduction in SYTOX Green fluorescence.

*hit strength*: based on scale-fold reduction described in Table 1 legend. Those without designation were inactive (i.e., z-score for luminescence reduction < 3). Those labeled toxic had a z-cytotox >=3.
